# Supplementary material
Source: PubMed Central journal article supplement (PMC4785796)
Supplement: NIHMS752484-supplement-1.pdf [file NIHMS752484-supplement-1.pdf]

## SUPPLEMENTAL MATERIAL

### Supplementary Figure Legends

**Supplementary Figure 1:** Buccal mucosa cells immunostained with different concentrations of antibodies against plakoglobin, Cx43, desmoplakin and plakophilin-1. The optimal dilution for the use of each antibody in buccal smears was defined as the lowest concentration providing bright immunoreactive signal at the cell edges. Cell nuclei (blue) are stained with DAPI.

**Supplementary Figure 2:** Representative images of sections of fixed human skin, human myocardium and mouse myocardium immunostained with antibodies against plakophilin-1 and plakophilin-2 with the same conditions used in buccal mucosa cells smears. Strong junctional signal for plakophilin-1 is seen in only keratinocytes, whereas strong signal for plakophilin-2 is seen only at intercalated discs in myocardium.

**Supplementary Figure 3:** Representative images of buccal mucosa smears from a control subject, and from family members of ACM probands who carry mutations in *JUP*, *PKP2* and *DSP* but showed no clinical evidence of heart disease. All mutation carriers show loss of junctional signal for plakoglobin and Cx43 in their buccal mucosa cells compared to controls. Cells from the *PKP2* mutation carrier show loss of signal for plakophilin-1 but not desmoplakin, whereas cells from the *DSP* mutation carrier show loss of signal for desmoplakin but not plakophilin-1. Cell nuclei (blue) are stained with DAPI.

Supplemental Figure 1

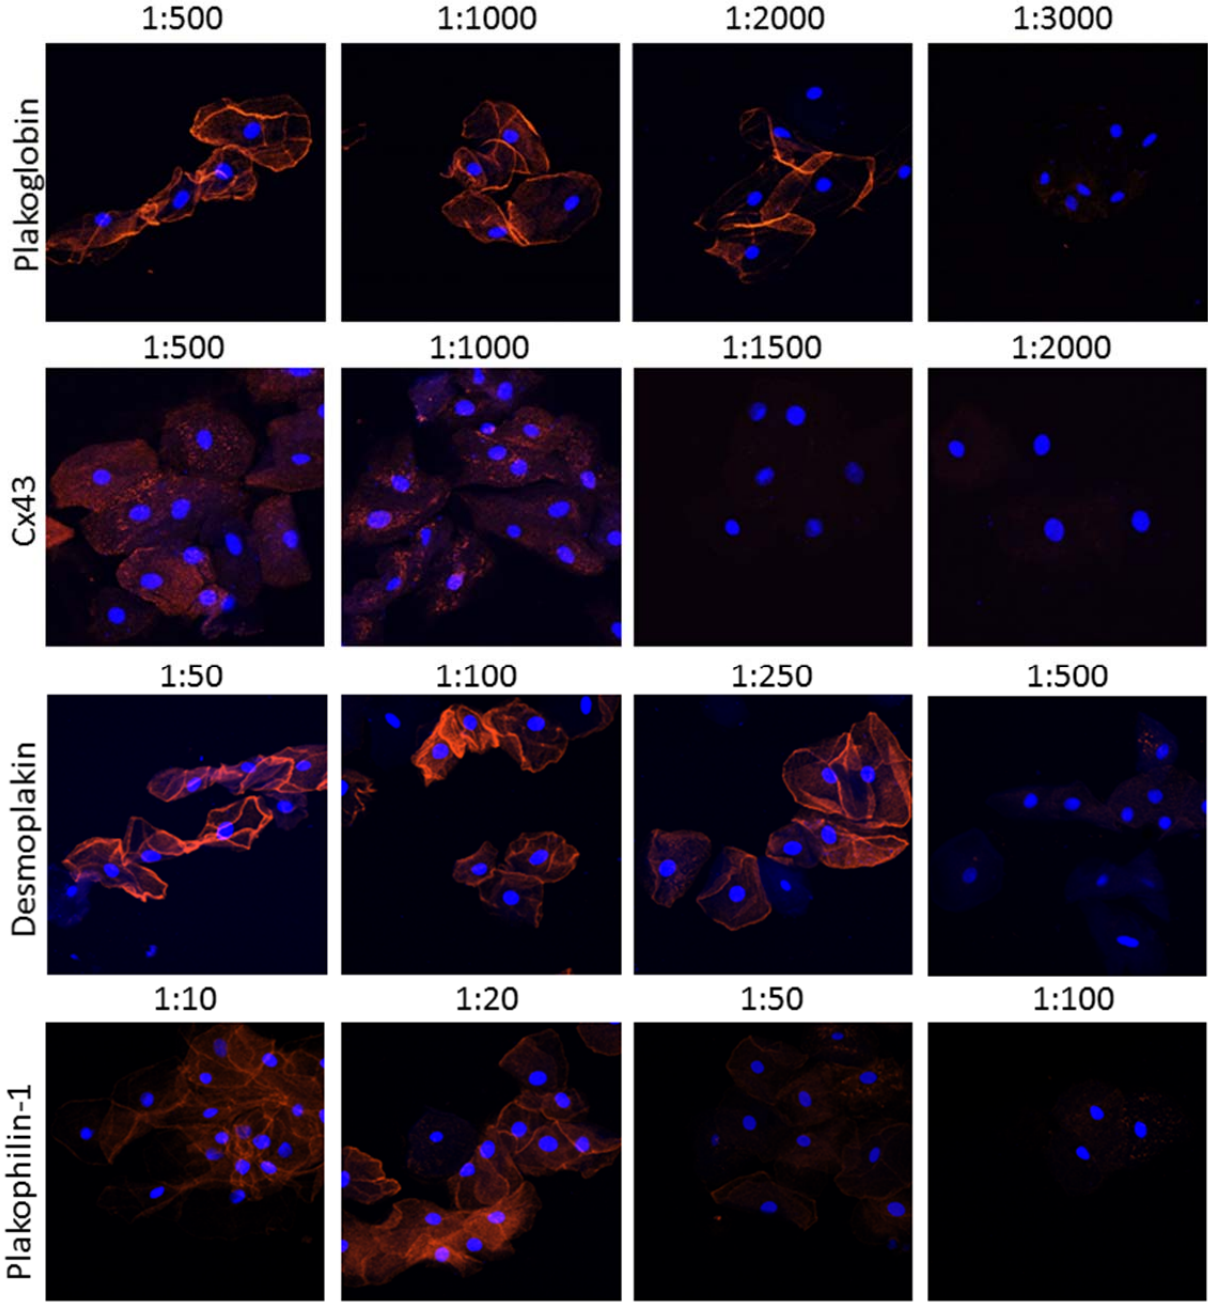

Supplemental Figure 2

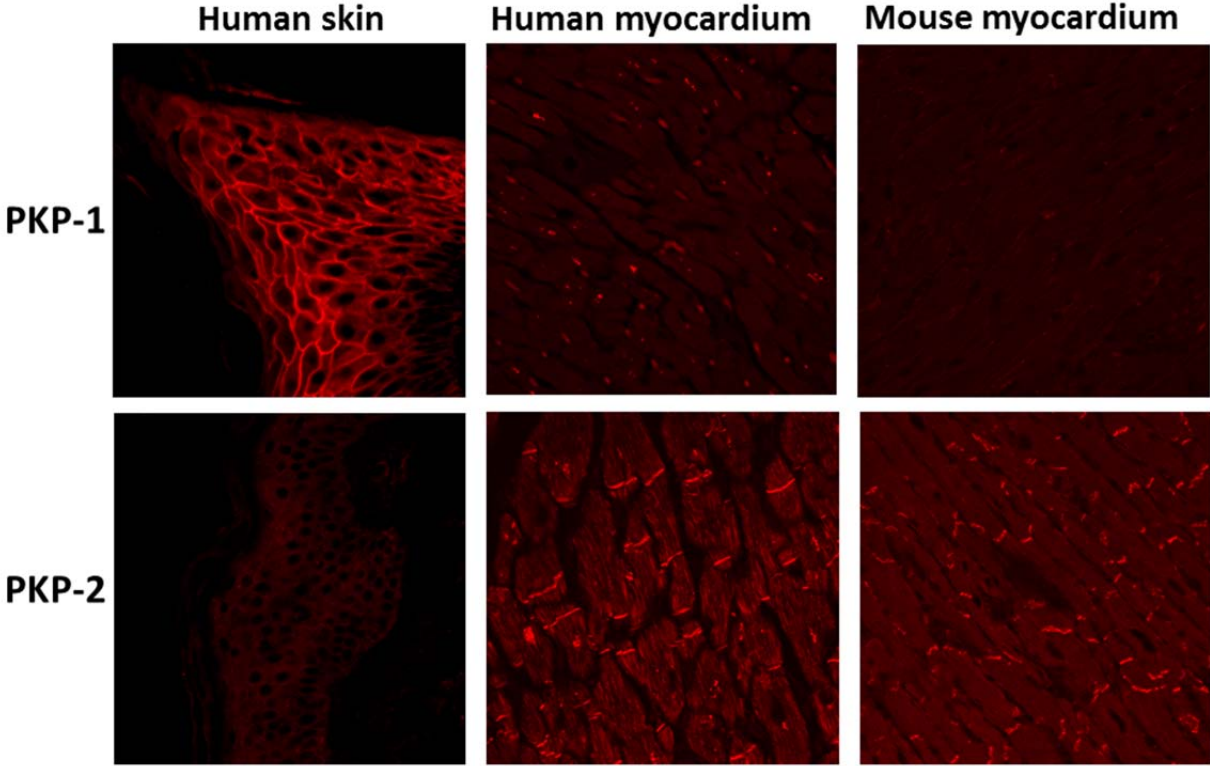

Supplemental Figure 3

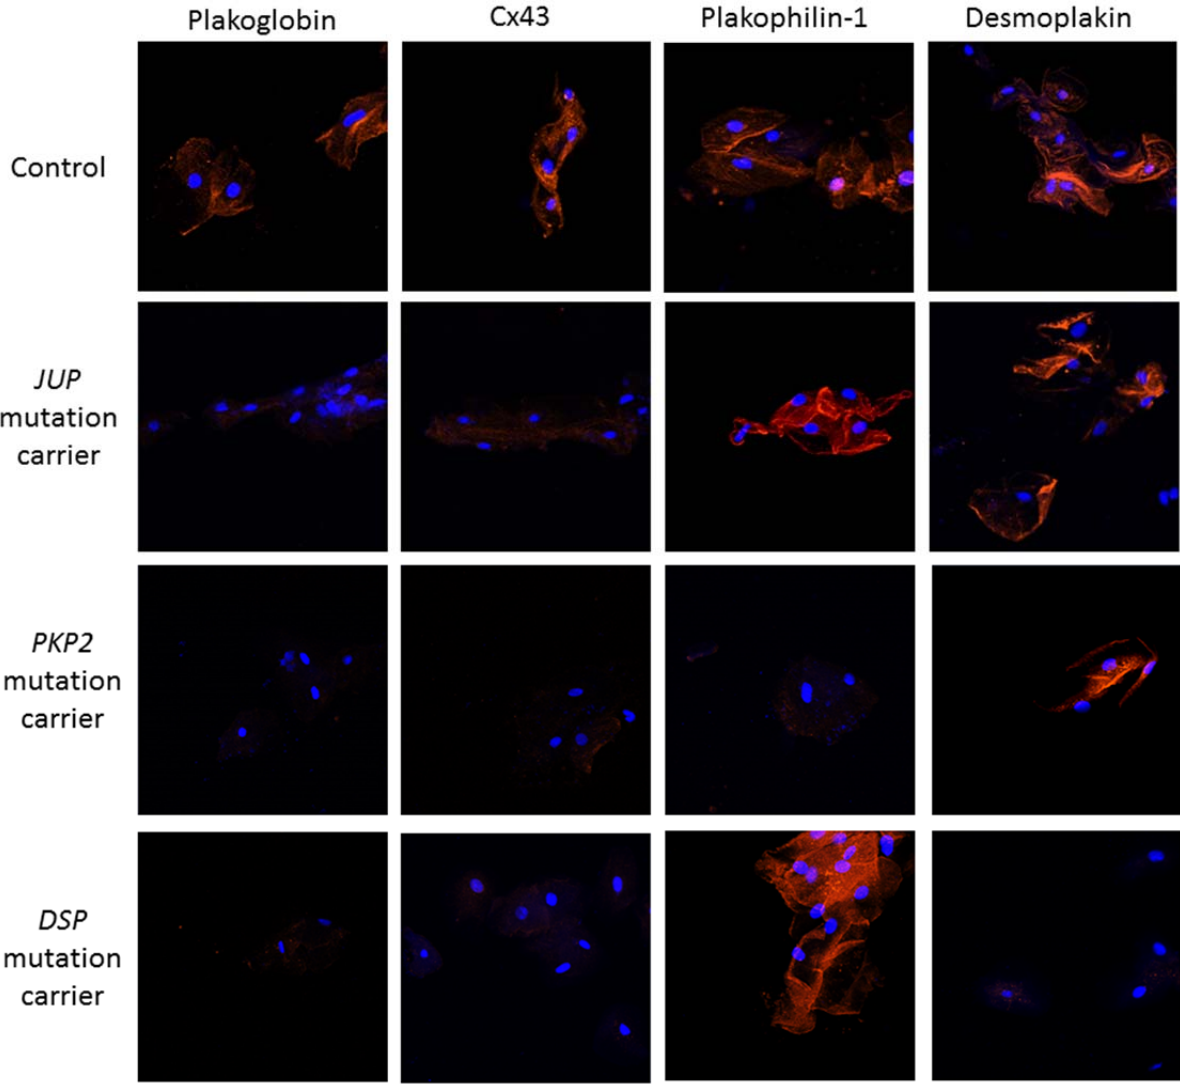

**Supplemental Table 1.** Desmosomal gene mutations in patients (Group 1) and carriers (Group 3).

| <b>GROUP 1<br/>(Patients)</b> | <b>Gene (n)</b>  | <b>Nucleotide Change</b> | <b>Amino Acid Change</b> | <b>No. of Patients<br/>n=39</b> |
|-------------------------------|------------------|--------------------------|--------------------------|---------------------------------|
|                               | <b>PKP2 (25)</b> | c.148_151delACAG         | p.Thr50SerfsX61          | 2                               |
|                               |                  | c.253_256delGAGT         | p.Glu85MetfsX26          | 1                               |
|                               |                  | c.971_980del10           | p.Ala324GlyfsX25         | 2                               |
|                               |                  | c.1237C>T                | p.Ala324GlyfsX25         | 1                               |
|                               |                  | c.1271T>C                | p.Phe424Ser              | 2                               |
|                               |                  | c.1307_1315delins8       | p.Leu436HisfsX11         | 1                               |
|                               |                  | c.1643delG               | p.Gly548ValfsX15         | 1                               |
|                               |                  | c.1821dupT               | p.Val608Cysfs            | 1                               |
|                               |                  | c.1849C>T                | p.Gln617X                | 1                               |
|                               |                  | c.1951C>T                | p.Arg651X                | 1                               |
|                               |                  | c.2013delC               | p.Lys672ArgfsX12         | 2                               |
|                               |                  | c.2145+1G>C              | Abnormal splice product  | 1                               |
|                               |                  | c.2146-1G>C              | Abnormal splice product  | 2                               |
|                               |                  | c.2197_2202delinsG       | p.His733AlafsX8          | 1                               |
|                               |                  | c.2484C>T (homozygous)   | Abnormal splice product  | 1                               |
|                               |                  | c.2489+1G>A              | Abnormal splice product  | 3                               |
|                               |                  | c.2509delA               | p.Ser837ValfsX94         | 2                               |
|                               |                  | <b>DSG2 (4)</b>          | c.1038_1040delGAA        | p.Lys346del                     |
|                               | c.1520G>A        |                          | p.Cys507Tyr              | 1                               |
|                               | c.2358delA       |                          | p.Asp787MetfsX21         | 2                               |
|                               | <b>DSP (2)</b>   | c.3474_3475insA          | p.Glu1159ArgfsX3         | 1                               |
|                               |                  | c.478C>T                 | p.Arg160X                | 1                               |
|                               | <b>DSC2 (2)</b>  | c.1112-1113delTG         | p.Val371GlyfsX8          | 1                               |
|                               |                  | c.1276G>A                | p.Glu426Lys              | 1                               |
|                               | <b>JUP (6)</b>   | c.2157delTG (homozygous) | p.Trp680GlyfsX11         | 6                               |

| <b>GROUP 3<br/>(Carriers)</b> | <b>Gene (n)</b> | <b>Nucleotide Change</b>   | <b>Amino Acid Change</b> | <b>No. of Carriers<br/>(n=15)</b> |
|-------------------------------|-----------------|----------------------------|--------------------------|-----------------------------------|
|                               | <b>DSP (2)</b>  | c.478C>T                   | p.Arg160X                | 1                                 |
|                               |                 | c.538G>A                   | p.Trp180X                | 1                                 |
|                               | <b>DSC2 (1)</b> | c.1276G>A                  | p.Glu426Lys              | 1                                 |
|                               | <b>JUP (12)</b> | c.2157delTG (heterozygous) | p.Trp680GlyfsX11         | 12                                |

**Abbreviations:** *DSC2*: Desmocollin-2; *DSG2*: desmoglein-2; *DSP*: Desmoplakin; *PKP2*: Plakophilin-2; *JUP*: Plakoglobin.

**Supplemental Table 2:** Summary of sources of primary antibodies and dilution factors used for optimized immunostaining of human buccal mucosa smears.

| <b>Protein</b>       | <b>Antibody Description</b> | <b>Commercial Source</b> | <b>Catalog Number</b> | <b>Dilution factor</b> |
|----------------------|-----------------------------|--------------------------|-----------------------|------------------------|
| <b>Plakoglobin</b>   | Mouse monoclonal            | Sigma Aldrich            | P8087                 | 1:2000                 |
| <b>Plakophilin-1</b> | Mouse monoclonal            | Santa Cruz Biotechnology | 3G250, sc-71900       | 1:20                   |
| <b>Desmoplakin</b>   | Mouse monoclonal            | Fitzgerald Industries    | 10R D108A             | 1:250                  |
| <b>Cx43</b>          | Rabbit polyclonal           | AbCam                    | ab11370               | 1:1000                 |
| <b>Plakophilin-2</b> | Mouse monoclonal            | Fitzgerald Industries    | 10R-P130b             | undiluted              |
